# Supplementary material for: Tween® Preserves Enzyme Activity and Stability in PLGA Nanoparticles
Source: Nanomaterials (Basel). 2021 Nov 3;11(11):2946. doi: 10.3390/nano11112946 (PMC8625811; doi:10.3390/nano11112946)
Supplement: Supplementary file 1 [file nanomaterials-11-02946-s001.zip › nanomaterials-1382363-supplementary.pdf]

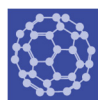

# Tween® Preserves Enzyme Activity and Stability in PLGA Nanoparticles

Jason Thomas Duskey <sup>1</sup>, Iliara Ottonelli <sup>1,2</sup>, Arianna Rinaldi <sup>1,2</sup>, Irene Parmeggiani <sup>1</sup>, Barbara Zambelli <sup>3</sup>, Leon Z. Wang <sup>4</sup>, Robert K. Prud'homme <sup>4</sup>, Maria Angela Vandelli <sup>1</sup>, Giovanni Tosi <sup>1</sup> and Barbara Ruozi <sup>1,\*</sup>

<sup>1</sup> Te.Far.T.I.-Nanotech Lab, Department of Life Sciences, University of Modena and Reggio Emilia, 41125 Modena, Italy; jasonthomas.duskey@unimore.it (J.T.D.); ilia.ottonelli@unimore.it (I.O.); arianna.rinaldi@unimore.it (A.R.); irene.parmeggiani@unimore.it (I.P.); mariaangela.vandelli@unimore.it (M.A.V.); gtosi@unimore.it (G.T.)

<sup>2</sup> Clinical and Experimental Medicine PhD Program, Department of Biomedical, Metabolic and Neural Sciences, University of Modena and Reggio Emilia, 41125 Modena, Italy

<sup>3</sup> Laboratory of Bioinorganic Chemistry, Department of Pharmacy and Biotechnology, University of Bologna, 40127 Bologna, Italy; barbara.zambelli@unibo.it

<sup>4</sup> Department of Chemical and Biological Engineering, Princeton University, Princeton, NJ 08544, USA; lzwang@princeton.edu (L.Z.W.); Prudhomm@princeton.edu (R.K.P.)

\* Correspondence: barbara.ruozzi@unimore.it; Tel.: +39-059-205-8562

**Table S1.** List of the abbreviations used in the main text

- % = percentage
- °C = Degrees Celsius
- AFM = Atomic Force Microscopy
- B-Glu =  $\beta$ -Glucosidase
- BBB = Blood Brain Barrier
- BSA = Bovine Serum Albumin
- CNS = Central Nervous System
- DCM = dichloromethane
- EE = entrapment efficiency
- ELSD = Evaporative Light Scattering Detector
- ERT = Enzyme Replacement Therapy
- GoF = Goodness of Fit
- h = hours
- ITC = Isothermal titration calorimetry
- J = joules
- K = kelvin
- KA = binding constant
- kHz = kilohertz
- LC = loading capacity
- ln = logarithm
- LSDs = Lysosomal Storage Disorders
- mg = milligram
- mg/mL = milligram per milliliter
- min = minute
- mL/min = milliliter per minute
- mm/Hg = millimeters of mercury

- mM= millimolar
- mol = mole
- MU = 4-Methylumbelliferone
- nm = nanometer
- NP = Nanoparticle
- p = p-value
- PBS = Phosphate-buffered saline
- PCS = Photon Correlation Spectroscopy
- PDI= polydispersity index
- PLGA = Poly(D, L-lactide-co-glycolide)
- pmol = picomole
- PVA = poly(vinyl alcohol)
- R = gas constant ( $8.314 \text{ J K}^{-1}\text{mol}^{-1}$ )
- RP-HPLC = Reversed-Phase High-Performance Liquid Chromatography
- rpm = revolutions per minute
- RT = room temperature
- s = second
- S.D. = standard deviation
- SEM-FEG = Scanning Electron Microscopy Field Emission Gun
- T = temperature in Kelvin
- VWD = Variable wavelength detector
- $\beta$ -Glu =  $\beta$ -Glucosidase
- $\Delta G$  = Gibbs Free Energy
- $\Delta H$  = enthalpy change
- $\zeta$ -pot = zeta potential
- $\mu\text{g}$  = microgram
- $\mu\text{g/mL}$  = microgram per milliliter
- $\mu\text{L}$  = microliter
- $\mu\text{M}$  = micromolar

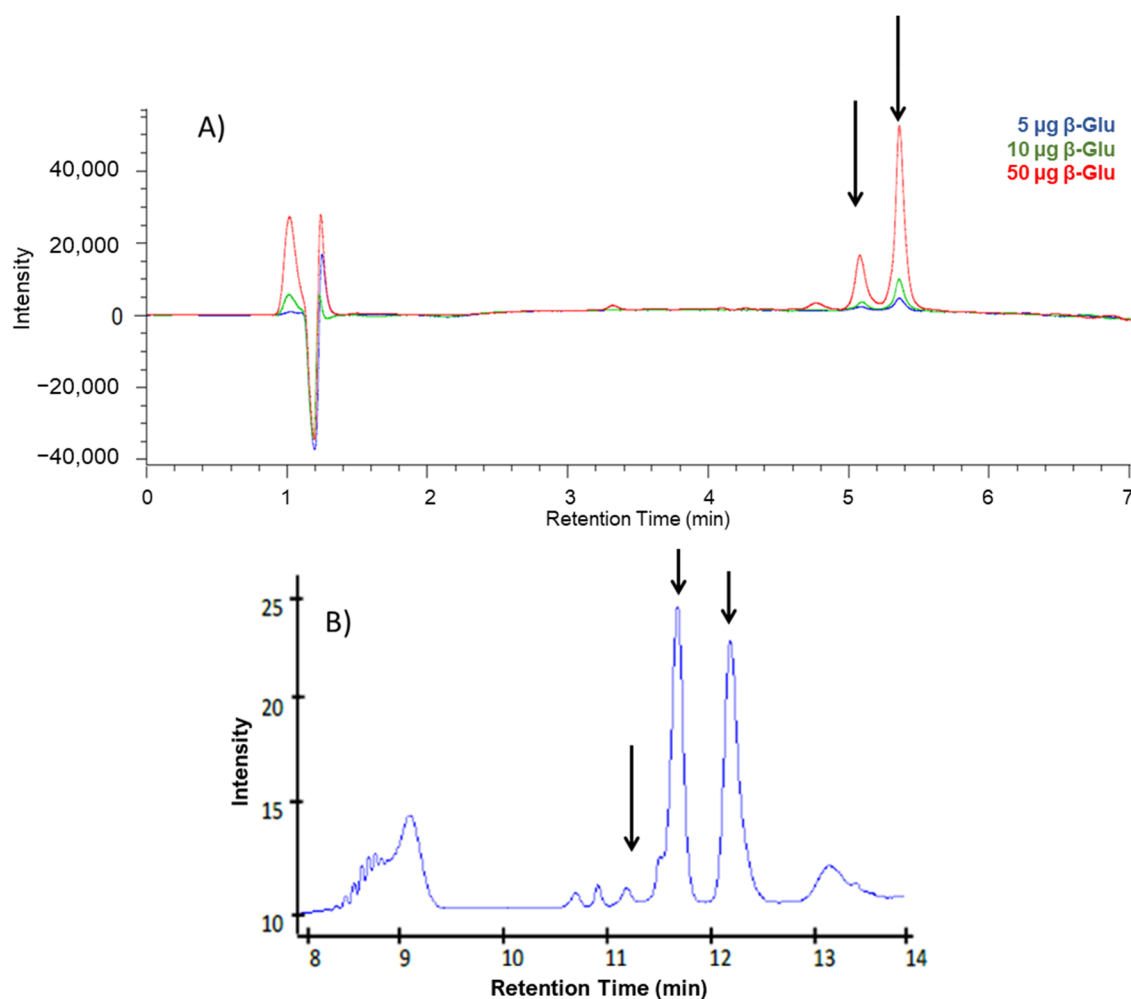

**Figure S1. HPLC Quantification.** Representative Chromatograms for the quantification of (A)  $\beta$ -Glucosidase and (B) Tween® 20.

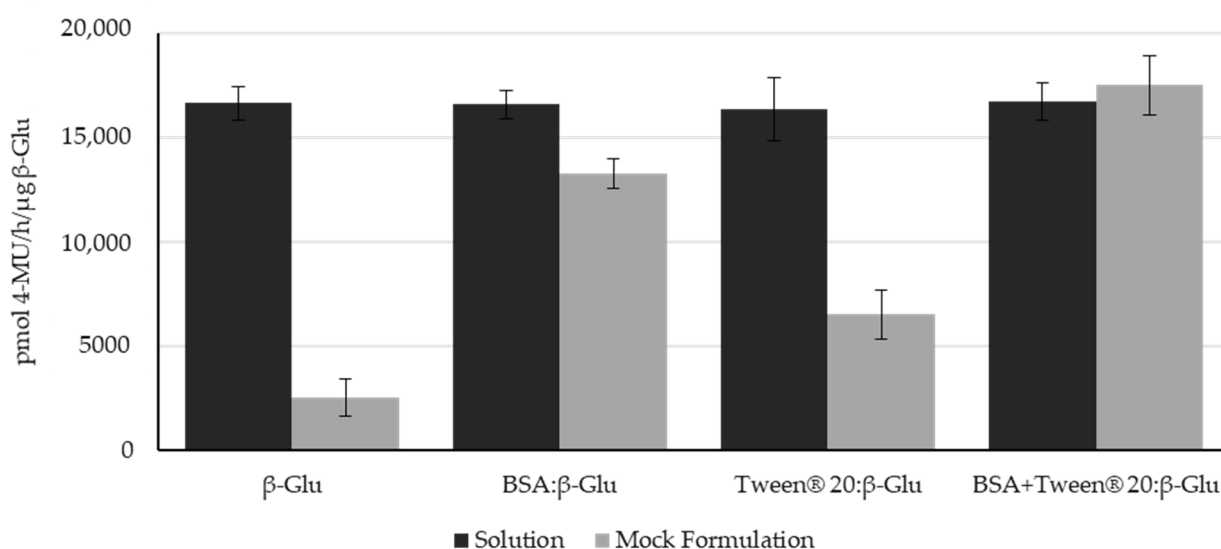

**Figure S2.  $\beta$ -Glucosidase Activity Controls.** Control samples of the  $\beta$ -Glucosidase activity in solution or after a mock formulation process (including organic solvents, sonication, and centrifugation) with or without the presence of each stabilizer.

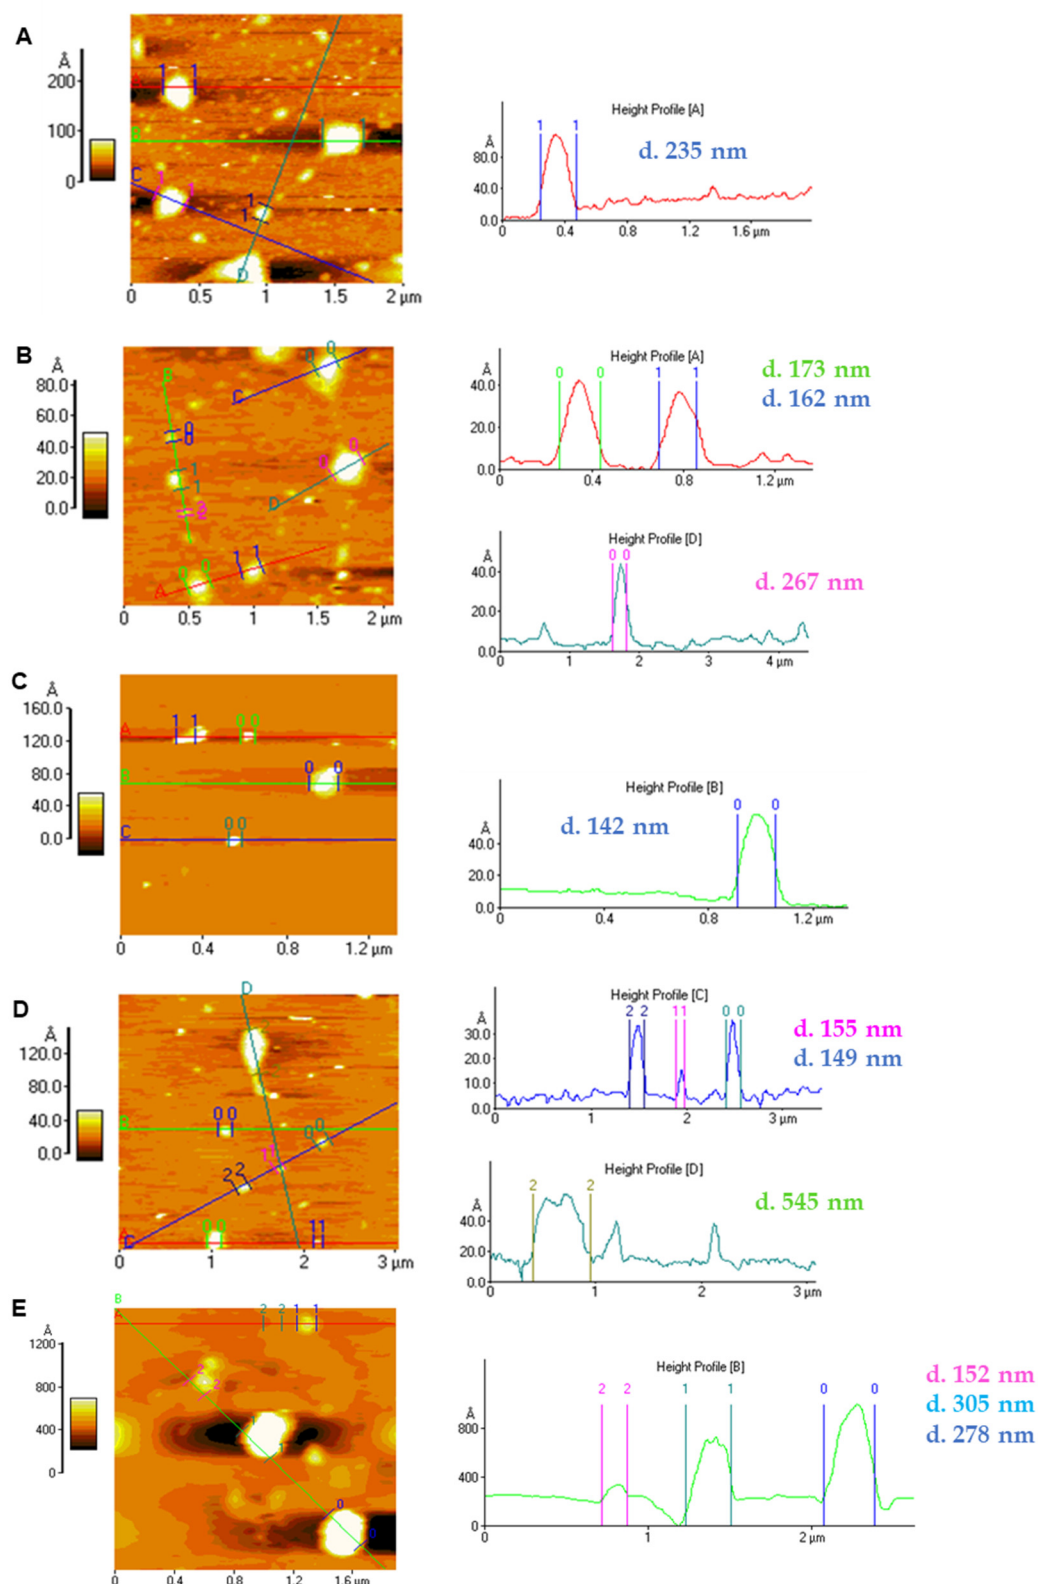

**Figure S3.** AFM images of the different Nanoparticle preparations. (A) NPs PLGA:Solution0; (B) NPs PLGA:Solution1; (C) NPs PLGA:Solution2; (D) NPs PLGA:Solution3; (E) NPs PLGA:Solution4. Note: all formulations contain 5 mg  $\beta$ -Glu.
